# Supplementary material
Source: ML conference proceedings conference paper supplement (https://proceedings.mlr.press/v119/chhaya20b.html)
Supplement: Supplementary file 1 [file chhaya20b-supp.pdf]

# Appendix : On Coresets for Regularized Regression

August 10, 2020

## Proof of Theorem 3.2

*Proof.* First we bound the sample size for a fixed query  $\mathbf{q} \in Q$ . Let  $s_i$  be the sensitivity of the  $i^{\text{th}}$  point  $\mathbf{x}_i$  and  $S$  be the sum of the sensitivities. Let the sampling probability be  $p_i = \frac{s_i}{S}$ .

For all  $\mathbf{q} \in Q$  and  $\mathbf{x}_i \in \mathbf{X}$  define a function  $g_{\mathbf{q}}(\mathbf{x}_i) = \frac{f_{\mathbf{q}}(\mathbf{x}_i)}{S p_i \sum_{j=1}^n f_{\mathbf{q}}(\mathbf{x}_j)}$ . So,

$$\mathbb{E}[g_{\mathbf{q}}(\mathbf{x}_i)] = \frac{1}{S}$$

and

$$\frac{1}{r} \sum_{\substack{i \in [n] \text{ s.t.} \\ \tilde{\mathbf{x}}_i \in \mathbf{C}}} g_{\mathbf{q}}(\mathbf{x}_i) = \frac{\sum_{\tilde{\mathbf{x}}_i \in \mathbf{C}} f_{\mathbf{q}}(\tilde{\mathbf{x}}_i)}{S \sum_{\mathbf{x}_i \in \mathbf{X}} f_{\mathbf{q}}(\mathbf{x}_i)}$$

Let

$$T = \sum_{\substack{i \in [n] \text{ s.t.} \\ \tilde{\mathbf{x}}_i \in \mathbf{C}}} g_{\mathbf{q}}(\mathbf{x}_i)$$

then

$$\mathbb{E}[T] = \sum_{\substack{i \in [n] \text{ s.t.} \\ \tilde{\mathbf{x}}_i \in \mathbf{C}}} \mathbb{E}[g_{\mathbf{q}}(\mathbf{x}_i)] = r/S$$

$$\begin{aligned} \text{var}(g_{\mathbf{q}}(\mathbf{x}_i)) &\leq \mathbb{E}[(g_{\mathbf{q}}(\mathbf{x}_i))^2] \\ &= \sum_{\mathbf{x}_i \in \mathbf{X}} \frac{(f_{\mathbf{q}}(\mathbf{x}_i))^2}{(\sum_{j=1}^n f_{\mathbf{q}}(\mathbf{x}_j))^2 S^2 p_i} \\ &\leq \sum_{\mathbf{x}_i \in \mathbf{X}} \frac{(f_{\mathbf{q}}(\mathbf{x}_i))^2 \sum_{j=1}^n f_{\mathbf{q}}(\mathbf{x}_j)}{(\sum_{j=1}^n f_{\mathbf{q}}(\mathbf{x}_j))^2 f_{\mathbf{q}}(\mathbf{x}_i) S} \\ &= 1/S \end{aligned}$$

We get the third equation by replacing values of  $p_i$  and  $s_i$ .

Now  $\text{var}(g_{\mathbf{q}}(\mathbf{x}_i)) \leq \mathbb{E}[(g_{\mathbf{q}}(\mathbf{x}_i))^2] \leq 1/S$ . So  $\text{var}(T) \leq r/S$ .  
Now applying Bernstein Inequality as given in [2] we get,

$$\Pr(|T - \mathbb{E}[T]| \geq r\epsilon') \leq \exp\left(-\frac{r^2\epsilon'^2}{r/S + r\epsilon'/3}\right)$$

$$\Pr\left(\left|\frac{\sum_{\tilde{\mathbf{x}}_i \in \mathbf{C}} f_{\mathbf{q}}(\tilde{\mathbf{x}}_i)}{S} - \frac{1}{S}\right| \geq \epsilon'\right) \leq \exp\left(-\frac{r\epsilon'^2}{(1/S) + (\epsilon'/3)}\right)$$

Replacing  $\epsilon'$  with  $\epsilon/S$  we get,

$$\Pr\left(\left|\sum_{\tilde{\mathbf{x}}_i \in \mathbf{C}} f_{\mathbf{q}}(\tilde{\mathbf{x}}_i) - \sum_{\mathbf{x}_i \in \mathbf{X}} f_{\mathbf{q}}(\mathbf{x}_i)\right| \geq \epsilon \sum_{\mathbf{x}_i \in \mathbf{X}} f_{\mathbf{q}}(\mathbf{x}_i)\right) \leq 2 \exp\left(\frac{-2r\epsilon^2}{S(1 + \frac{\epsilon}{3})}\right)$$

To make the above probability less than  $\delta$ , we choose  $r \geq \frac{S}{2\epsilon^2}(1 + \frac{\epsilon}{3}) \log \frac{2}{\delta}$  which depends on  $S$  for a fixed query  $\mathbf{q} \in Q$ . Now to bound the number of samples required to give a uniform bound for all queries simultaneously  $\forall \mathbf{q} \in Q$ , we use the same  $\epsilon$ -net argument as described in [1]. This part is essentially a repeat of their argument. However we present it here for completeness. Observe that function  $g_{\mathbf{q}}(\mathbf{x}_i)$  lies in the interval  $[0, 1]$ . Due to the bounded dimension  $d$  of  $Q$ , the queries in  $Q$  span a subspace of  $[0, 1]^d$ . There may be an infinite number of queries in  $Q$ . However these may be covered up to  $L_1$  distance  $\epsilon/2$  by some set  $Q^* \subset Q$  of  $O(\epsilon^{-d})$  points [3] as given in [1]. For the  $\epsilon$ -net argument let  $\mathcal{E}$  be the bad event that the coresets property is not satisfied by some  $\mathbf{C}$ . Therefore

$$\begin{aligned} \Pr(\mathcal{E}) &= \Pr\left[\exists \mathbf{q} \in Q : \left|\sum_{\tilde{\mathbf{x}}_i \in \mathbf{C}} f_{\mathbf{q}}(\tilde{\mathbf{x}}_i) - \sum_{\mathbf{x}_i \in \mathbf{X}} f_{\mathbf{q}}(\mathbf{x}_i)\right| > \epsilon \sum_{\mathbf{x}_i \in \mathbf{X}} f_{\mathbf{q}}(\mathbf{x}_i)\right] \\ &\leq \Pr\left[\exists \mathbf{q} \in Q^* : \left|\sum_{\tilde{\mathbf{x}}_i \in \mathbf{C}} f_{\mathbf{q}}(\tilde{\mathbf{x}}_i) - \sum_{\mathbf{x}_i \in \mathbf{X}} f_{\mathbf{q}}(\mathbf{x}_i)\right| > \frac{\epsilon}{2} \sum_{\mathbf{x}_i \in \mathbf{X}} f_{\mathbf{q}}(\mathbf{x}_i)\right] \\ &\leq 2|Q^*| \exp\left(\frac{-2r\epsilon^2}{S(1 + \frac{\epsilon}{3})}\right) \end{aligned}$$

To make  $\mathbf{C}$  an  $\epsilon$ -coreset with probability at least  $1-\delta$ , we choose  $r = O(\frac{S}{\epsilon^2}(\log |Q^*| + \log \frac{2}{\delta}))$ . Now as  $|Q^*| \in O(\epsilon^{-d})$  we have  $r = O(\frac{S}{\epsilon^2}(d \log \frac{1}{\epsilon} + \log \frac{1}{\delta}))$ .  $\square$

## Generalizing the Proof of Corollary 4.1.1

The proof can be generalized to the setting when  $\mathbf{b}$  is in the column-space of  $\mathbf{A}$  in the following manner. Suppose  $\mathbf{b} = \mathbf{A}\mathbf{u}$ . Also suppose  $\mathbf{A}_{\mathbf{c}}$  and  $\mathbf{b}_{\mathbf{c}}$  can be obtained as  $\mathbf{A}_{\mathbf{c}} = \mathbf{S}\mathbf{A}$  and  $\mathbf{b}_{\mathbf{c}} = \mathbf{S}\mathbf{b}$  where  $\mathbf{S}$  can be either a sampling and reweighing or a sketching matrix. Now we want to prove the following : If  $\mathbf{S}$  is a coresets creation matrix for  $(\mathbf{A}, \mathbf{b})$  for regression i.e.  $\forall \mathbf{x}, \|\mathbf{A}_{\mathbf{c}}\mathbf{x} - \mathbf{b}_{\mathbf{c}}\|_p^r \in (1 \pm \epsilon)\|\mathbf{A}\mathbf{x} - \mathbf{b}\|_p^r$ , then it must be that  $\forall \mathbf{x}, \|\mathbf{A}_{\mathbf{c}}\mathbf{x}\|_p^r \in (1 \pm \epsilon)\|\mathbf{A}\mathbf{x}\|_p^r$ . Proving this statement and using

Theorem 4.1 essentially proves the corollary for the more general setting of  $\mathbf{b}$  in column space of  $\mathbf{A}$ . To prove the statement we use contradiction. Let us suppose that the statement is false. Then  $\exists \mathbf{v} \in \mathbb{R}^d$  s.t.  $\|\mathbf{A}_c \mathbf{v}\|_p^r > (1 + \epsilon) \|\mathbf{A} \mathbf{v}\|_p^r$ . We will create a  $\mathbf{y}$  s.t that  $\|\mathbf{A}_c \mathbf{y} - \mathbf{b}_c\|_p^r > (1 + \epsilon) \|\mathbf{A} \mathbf{y} - \mathbf{b}\|_p^r$ . Consider the ratio

$$\frac{\|\mathbf{S}(\mathbf{A} \mathbf{y} - \mathbf{b})\|_p^r}{\|\mathbf{A} \mathbf{y} - \mathbf{b}\|_p^r} = \frac{\|\mathbf{S} \mathbf{A}(\mathbf{y} - \mathbf{u})\|_p^r}{\|\mathbf{A}(\mathbf{y} - \mathbf{u})\|_p^r}$$

Now if we choose  $\mathbf{y} = \mathbf{u} + \mathbf{v}$  then we have  $\frac{\|\mathbf{S} \mathbf{A} \mathbf{v}\|_p^r}{\|\mathbf{A} \mathbf{v}\|_p^r} > (1 + \epsilon)$ . This a contradiction to the fact that  $(\mathbf{S} \mathbf{A}, \mathbf{S} \mathbf{b})$  is coresets for  $\|\mathbf{A} \mathbf{y} - \mathbf{b}\|_p^r$ . Hence our assumption is false. So  $\forall \mathbf{x}, \|\mathbf{A}_c \mathbf{x}\|_p^r \leq (1 + \epsilon) \|\mathbf{A} \mathbf{x}\|_p^r$ . The other direction for coresets definition is proved in similar manner. This combined with the Theorem 4.1 gives our corollary

## Proof of Corollary 6.1.1

*Proof.* For  $\hat{\mathbf{A}} = [\mathbf{A} \quad -\mathbf{B}]$  and  $\hat{\mathbf{X}} = \begin{bmatrix} \mathbf{X} \\ \mathbf{I}_k \end{bmatrix}$  where  $\mathbf{I}_k$  is  $k$ -dimensional identity matrix, the sensitivity of Multiresponse RLAD problem is given as

$$s_i = \sup_{\hat{\mathbf{x}}} \frac{\|\hat{\mathbf{a}}_i^T \hat{\mathbf{X}}\|_1 + \frac{\lambda \|\hat{\mathbf{X}}\|_1}{n}}{\sum_j \|\hat{\mathbf{a}}_j^T \hat{\mathbf{X}}\|_1 + \lambda \|\hat{\mathbf{X}}\|_1}$$

Let  $\hat{\mathbf{A}} = \mathbf{U} \mathbf{Y}$  where  $\mathbf{U}$  is an  $(\alpha, \beta, 1)$  well conditioned basis for  $\hat{\mathbf{A}}$ . So  $\hat{\mathbf{a}}_j^T \hat{\mathbf{X}} = \mathbf{u}_j^T \mathbf{Y} \hat{\mathbf{X}}$ . Let  $\mathbf{Y} \hat{\mathbf{X}} = \mathbf{Z}$ . So the sensitivity equation becomes

$$\begin{aligned} s_i &= \sup_{\mathbf{z}} \frac{\|\mathbf{u}_i^T \mathbf{z}\|_1 + \frac{\lambda \|\mathbf{Y}^{-1} \mathbf{z}\|_1}{n}}{\sum_j \|\mathbf{u}_j^T \mathbf{z}\|_1 + \lambda \|\mathbf{Y}^{-1} \mathbf{z}\|_1} \\ &\leq \sup_{\mathbf{z}} \frac{\|\mathbf{u}_i^T \mathbf{z}\|_1}{\sum_j \|\mathbf{u}_j^T \mathbf{z}\|_1 + \lambda \|\mathbf{Y}^{-1} \mathbf{z}\|_1} + \frac{1}{n} \end{aligned}$$

Instead of supremum of the first quantity on the right hand side, we take the infimum of its reciprocal. Lets call it  $m$ .

$$\begin{aligned} m &= \inf_{\mathbf{z}} \frac{\sum_j \|\mathbf{u}_j^T \mathbf{z}\|_1 + \lambda \|\mathbf{Y}^{-1} \mathbf{z}\|_1}{\|\mathbf{u}_i^T \mathbf{z}\|_1} \\ &\geq \inf_{\mathbf{z}} \frac{\sum_j \|\mathbf{u}_j^T \mathbf{z}\|_1}{\|\mathbf{u}_i^T \mathbf{z}\|_1} + \inf_{\mathbf{z}} \frac{\lambda \|\mathbf{Y}^{-1} \mathbf{z}\|_1}{\|\mathbf{u}_i^T \mathbf{z}\|_1} \end{aligned}$$

Let us consider the first part.  $\mathbf{U}$  is an  $(\alpha, \beta, 1)$ - well conditioned basis for  $\hat{\mathbf{A}}$ . Hence by definition  $\|\mathbf{U}\|_1 \leq \alpha$  and  $\forall \mathbf{z} \in \mathbb{R}^{d+k}, \|\mathbf{z}\|_\infty \leq \beta \|\mathbf{U} \mathbf{z}\|_1$ . So the first

term in the infimum

$$\begin{aligned}
& \inf_{\mathbf{z}} \frac{\sum_j \|\mathbf{u}_j^T \mathbf{Z}\|_1}{\|\mathbf{u}_i^T \mathbf{Z}\|_1} \\
&= \inf_{\mathbf{z}} \frac{\sum_{l=1}^k \|\mathbf{Uz}^l\|_1}{\sum_{l=1}^k |\mathbf{u}_i^T \mathbf{z}^l|} \\
&\geq \frac{\frac{1}{\beta} \sum_{l=1}^k \|\mathbf{z}^l\|_\infty}{\|\mathbf{u}_i\|_1 \sum_{l=1}^k \|\mathbf{z}^l\|_\infty} \\
&= \frac{1}{\beta \|\mathbf{u}_i\|_1}
\end{aligned}$$

Now for the second term in the infimum let us consider instead

$$\begin{aligned}
& \inf_{\mathbf{z}} \frac{\|\mathbf{AY}^{-1}\mathbf{Z}\|_1}{\|\mathbf{u}_i^T \mathbf{Z}\|_1} \\
&= \inf_{\mathbf{z}} \frac{\|\mathbf{UZ}\|_1}{\|\mathbf{u}_i^T \mathbf{Z}\|_1} \\
&\geq \frac{1}{\beta \|\mathbf{u}_i\|_1}
\end{aligned}$$

Now  $\|\mathbf{AY}^{-1}\mathbf{Z}\|_1 \leq \|\mathbf{A}\|_{(1)} \|\mathbf{Y}^{-1}\mathbf{Z}\|_1$ . Therefore

$$\begin{aligned}
& \inf_{\mathbf{z}} \frac{\|\mathbf{Y}^{-1}\mathbf{Z}\|_1}{\|\mathbf{u}_i^T \mathbf{Z}\|_1} \\
&\geq \inf_{\mathbf{z}} \frac{\|\mathbf{AY}^{-1}\mathbf{Z}\|_1}{\|\mathbf{A}\|_{(1)} \|\mathbf{u}_i^T \mathbf{Z}\|_1} \\
&\geq \frac{1}{\beta \|\mathbf{A}\|_{(1)} \|\mathbf{u}_i\|_1}
\end{aligned}$$

Combining both these

$$m \geq \frac{1}{\beta \|\mathbf{u}_i\|_1} \left( 1 + \frac{\lambda}{\|\mathbf{A}\|_{(1)}} \right)$$

Now sensitivity of  $i^{th}$  point is bounded as  $s_i \leq \frac{1}{m} + \frac{1}{n}$ . Therefore  $s_i \leq \frac{\beta \|\mathbf{u}_i\|_1}{1 + \|\mathbf{A}\|_{(1)}} + \frac{1}{n}$ .

So the sum of sensitivities is bounded by  $S \leq \frac{\alpha\beta}{1 + \|\mathbf{A}\|_{(1)}} + 1$ . This fact combined with fact that dimension of  $\mathbf{X}$  is  $dk$  and applying theorem 3.2 proves the corollary  $\square$

## References

- [1] Olivier Bachem, Mario Lucic, and Andreas Krause. Practical coresets constructions for machine learning. *arXiv preprint arXiv:1703.06476*, 2017.

- [2] Devdatt P Dubhashi and Alessandro Panconesi. *Concentration of measure for the analysis of randomized algorithms*. Cambridge University Press, 2009.
- [3] David Haussler. Sphere packing numbers for subsets of the boolean n-cube with bounded vapnik-chervonenkis dimension. *J. Comb. Theory, Ser. A*, 69(2):217–232, 1995.
